# Supplementary material for: Optimized Extraction of Phenylpropanoids and Flavonoids from Lemon Verbena Leaves by Supercritical Fluid System Using Response Surface Methodology
Source: MDPI journal article supplement (doi:10.3390/foods9070931), 2020-07-14
Supplement: s1 [file s1]

# Supercritical-Fluid Process Control to Functional Food Ingredient Development: *Lippia citriodora*

Francisco-Javier Leyva-Jiménez<sup>1</sup>, Jesús Lozano-Sánchez<sup>1,2\*</sup>, Maria de la Luz Cádiz-Gurrea<sup>1,3</sup>, Alvaro Fernández-Ochoa<sup>1,3</sup>, David Arráez-Román<sup>1,3+</sup>, Antonio Segura-Carretero<sup>1,3+</sup>.

<sup>1</sup> Functional Food Research and Development Center, Health Science Technological Park, Avenida del Conocimiento s/n, E-18016 Granada, Spain <sup>2</sup>; FJLJ: jleyva@cidaf.es

<sup>2</sup> Department of Food Science and Nutrition, University of Granada, Campus of Cartuja, 18071 Granada, Spain; JLS: jesusls@ugr.es

<sup>3</sup> Department of Analytical Chemistry, Faculty of Sciences, University of Granada, Fuentenueva s/n, E- 18071 Granada, Spain; MdlLCG: mluzcadiz@ugr.es; AFO: alvaroferochoa@ugr.es; DAR: darraez@ugr.es; ASC: ansegura@ugr.es.

+ These authors are joint senior authors on this work

\* Correspondence: jesusls@ugr.es; Tel.: +34-958-637083

Received: 31 May 2020; Accepted: 6 July 2020; Published: 14 July 2020

**Supporting information Table 1A : Quantitation of individual compounds presents in *L. citriodora* supercritical extracts ( $\mu\text{g}$  of analyte/ g of dried extract). Value =  $X \pm \text{SD}$ .**

|                                      | SFE 1            | SFE 2           | SFE 3            | SFE 4            | SFE 5           | SFE 6           | SFE 7           | SFE 8            | SFE 9           |
|--------------------------------------|------------------|-----------------|------------------|------------------|-----------------|-----------------|-----------------|------------------|-----------------|
| <i>Iridioids</i>                     | 4388 $\pm$ 185   | 1345 $\pm$ 68   | 5558 $\pm$ 369   | 899 $\pm$ 108    | 1460 $\pm$ 49   | 1706 $\pm$ 79   | NQ              | 3708 $\pm$ 255   | 1357 $\pm$ 35   |
| <i>Shanzhiside</i>                   | 98 $\pm$ 19      | NQ              | 240 $\pm$ 2      | NQ               | NQ              | NQ              | ND              | NQ               | NQ              |
| <i>Gardoside</i>                     | 2490 $\pm$ 71    | 805 $\pm$ 28    | 3057 $\pm$ 145   | 719 $\pm$ 57     | 1351 $\pm$ 37   | 1397 $\pm$ 34   | NQ              | 2086 $\pm$ 78    | 1171 $\pm$ 3    |
| <i>Theveside</i>                     | 357 $\pm$ 22     | NQ              | 475 $\pm$ 33     | NQ               | NQ              | NQ              | ND              | 111 $\pm$ 33     | NQ              |
| <i>Myxopyroside</i>                  | 720 $\pm$ 2      | 433 $\pm$ 14    | 324 $\pm$ 41     | 180 $\pm$ 51     | 74 $\pm$ 4      | 268 $\pm$ 39    | NQ              | 721 $\pm$ 74     | 181 $\pm$ 35    |
| <i>Lamiidoside</i>                   | NQ               | 97 $\pm$ 23     | 215 $\pm$ 14     | ND               | NQ              | NQ              | ND              | NQ               | NQ              |
| <i>Hydroxycampsid</i>                | 21 $\pm$ 14      | NQ              | 239 $\pm$ 52     | NQ               | NQ              | NQ              | ND              | 49 $\pm$ 22      | NQ              |
| <i>Lippianoside B</i>                | 39 $\pm$ 2       | NQ              | 248 $\pm$ 35     | ND               | NQ              | NQ              | ND              | 160 $\pm$ 17     | NQ              |
| <i>Durantioside I</i>                | 219 $\pm$ 41     | NQ              | 467 $\pm$ 46     | NQ               | 24 $\pm$ 3      | NQ              | ND              | 253 $\pm$ 18     | NQ              |
| <i>Manuleoside H</i>                 | 429 $\pm$ 14     | 40 $\pm$ 3      | 293 $\pm$ 1      | NQ               | 11 $\pm$ 5      | 41 $\pm$ 6      | ND              | 328 $\pm$ 13     | 4.9 $\pm$ 0.4   |
| <i>Phenylpropanoids</i>              | 5992 $\pm$ 97    | 2312 $\pm$ 136  | 28745 $\pm$ 1617 | 388 $\pm$ 20     | 4167 $\pm$ 265  | 1816 $\pm$ 121  | 184 $\pm$ 5     | 13318 $\pm$ 1216 | 6390 $\pm$ 249  |
| <i>Verbascoside</i>                  | 384 $\pm$ 21     | NQ              | 655 $\pm$ 54     | NQ               | 109 $\pm$ 9     | 12 $\pm$ 5      | NQ              | 306 $\pm$ 28     | 61 $\pm$ 10     |
| <i>Verbascoside</i>                  | 3629 $\pm$ 30    | 1949 $\pm$ 99   | 21984 $\pm$ 1200 | 388 $\pm$ 20     | 3247 $\pm$ 214  | 1560 $\pm$ 73   | 184 $\pm$ 5     | 9764 $\pm$ 1042  | 5210 $\pm$ 195  |
| <i>Lariciresinol glucopyranoside</i> | 478 $\pm$ 11     | 147 $\pm$ 13    | 490 $\pm$ 39     | NQ               | 133 $\pm$ 4     | 105 $\pm$ 16    | NQ              | 449 $\pm$ 24     | 117 $\pm$ 13    |
| <i>Isoverbascoside</i>               | 141 $\pm$ 8      | NQ              | 1389 $\pm$ 129   | NQ               | 81 $\pm$ 10     | NQ              | NQ              | 644.5 $\pm$ 0.1  | 207 $\pm$ 7     |
| <i>Forsythoside A</i>                | 249 $\pm$ 7      | NQ              | 1829 $\pm$ 107   | NQ               | 144.1 $\pm$ 0.1 | NQ              | NQ              | 611 $\pm$ 18     | 366 $\pm$ 9     |
| <i>Leucoseptoside A or isomer</i>    | 176 $\pm$ 2      | NQ              | 990 $\pm$ 31     | NQ               | 104 $\pm$ 8     | NQ              | NQ              | 445 $\pm$ 30     | 119 $\pm$ 1     |
| <i>Leucoseptoside A or isomer</i>    | NQ               | NQ              | NQ               | ND               | NQ              | NQ              | ND              | NQ               | NQ              |
| <i>Martynoside or isomer</i>         | 604 $\pm$ 18     | 187 $\pm$ 14    | 974 $\pm$ 56     | NQ               | 244 $\pm$ 14    | 107 $\pm$ 17    | NQ              | 806 $\pm$ 46     | 255 $\pm$ 8     |
| <i>Martynoside or isomer</i>         | NQ               | NQ              | NQ               | NQ               | NQ              | NQ              | ND              | NQ               | NQ              |
| <i>Osmanthisude B</i>                | 331.0 $\pm$ 0.6  | 29 $\pm$ 10     | 434 $\pm$ 1      | NQ               | 105 $\pm$ 6     | 32 $\pm$ 10     | NQ              | 293 $\pm$ 28     | 55 $\pm$ 6      |
| <i>Flavonoids</i>                    | 17833 $\pm$ 1099 | 17864 $\pm$ 617 | 18849 $\pm$ 1128 | 15061 $\pm$ 1010 | 14172 $\pm$ 518 | 17547 $\pm$ 500 | 11095 $\pm$ 983 | 12274 $\pm$ 841  | 23113 $\pm$ 355 |
| <i>Methyl quercetin</i>              | 929 $\pm$ 63     | 958 $\pm$ 29    | 1111 $\pm$ 96    | 889 $\pm$ 52     | 885 $\pm$ 45    | 1117 $\pm$ 30   | 140 $\pm$ 9     | 718 $\pm$ 53     | 1044 $\pm$ 86   |
| <i>Dimethyl Kaempferol</i>           | 5028 $\pm$ 285   | 4605 $\pm$ 59   | 5162 $\pm$ 147   | 3625 $\pm$ 124   | 3837 $\pm$ 261  | 4801 $\pm$ 114  | 1930 $\pm$ 156  | 3143 $\pm$ 18    | 6447 $\pm$ 48   |
| <i>Dimethyl quercetin</i>            | 11876 $\pm$ 751  | 12301 $\pm$ 529 | 12576 $\pm$ 885  | 10547 $\pm$ 834  | 9450 $\pm$ 212  | 11629 $\pm$ 356 | 9025 $\pm$ 818  | 8413 $\pm$ 770   | 15622 $\pm$ 221 |
| <i>Total</i>                         | 28213 $\pm$ 1381 | 21521 $\pm$ 821 | 53152 $\pm$ 3111 | 16348 $\pm$ 1138 | 19799 $\pm$ 832 | 21069 $\pm$ 700 | 11279 $\pm$ 988 | 30183 $\pm$ 2312 | 30830 $\pm$ 639 |

\*NQ: Not quantified. Compound detected, but their concentration is between the detection and quantification limits. \*ND: Not detected. Compound concentration is below of detection limit.

**Supporting information Table 1B : Quantitation of individual compounds presents in *L. citriodora* supercritical extracts ( $\mu\text{g}$  of analyte/ g of extract). Value =  $X \pm \text{SD}$ .**

| Condition Compound                   | SFE 10                            | SFE 11                           | SFE 12                             | SFE 13                             | SFE 14                             | SFE 15                            | SFE 16                             | SFE 17                             | SFE 18                             |
|--------------------------------------|-----------------------------------|----------------------------------|------------------------------------|------------------------------------|------------------------------------|-----------------------------------|------------------------------------|------------------------------------|------------------------------------|
| <i>Iridioids</i>                     | <b>825 <math>\pm</math> 60</b>    | <b>NQ</b>                        | <b>1416 <math>\pm</math> 101</b>   | <b>7172 <math>\pm</math> 215</b>   | <b>1715 <math>\pm</math> 101</b>   | <b>1173 <math>\pm</math> 40</b>   | <b>6663 <math>\pm</math> 436</b>   | <b>3840 <math>\pm</math> 144</b>   | <b>199 <math>\pm</math> 15</b>     |
| <i>Shanzhiside</i>                   | NQ                                | ND                               | NQ                                 | 265 $\pm$ 25                       | NQ                                 | NQ                                | 147.8 $\pm$ 0.3                    | NQ                                 | NQ                                 |
| <i>Gardoside</i>                     | 395 $\pm$ 15                      | NQ                               | 976 $\pm$ 71                       | 3136 $\pm$ 26                      | 1019 $\pm$ 58                      | 568 $\pm$ 34                      | 2904 $\pm$ 188                     | 1671 $\pm$ 2                       | 19 $\pm$ 6                         |
| <i>Theveside</i>                     | NQ                                | ND                               | NQ                                 | 676 $\pm$ 11                       | NQ                                 | NQ                                | 505 $\pm$ 41                       | 87 $\pm$ 17                        | NQ                                 |
| <i>Myxopyroside</i>                  | 408 $\pm$ 32                      | NQ                               | 414 $\pm$ 24                       | 680 $\pm$ 29                       | 316 $\pm$ 10                       | 574 $\pm$ 5                       | 834 $\pm$ 59                       | 1018 $\pm$ 22                      | 180 $\pm$ 9                        |
| <i>Lamiidoside</i>                   | NQ                                | ND                               | NQ                                 | 326 $\pm$ 15                       | 380 $\pm$ 33                       | NQ                                | 299 $\pm$ 29                       | NQ                                 | ND                                 |
| <i>Hydroxycampsiside</i>             | NQ                                | ND                               | NQ                                 | 354 $\pm$ 30                       | NQ                                 | NQ                                | 352 $\pm$ 50                       | 21 $\pm$ 6                         | NQ                                 |
| <i>Lippianoside B</i>                | NQ                                | ND                               | NQ                                 | 503 $\pm$ 11                       | NQ                                 | NQ                                | 438 $\pm$ 25                       | 187 $\pm$ 56                       | NQ                                 |
| <i>Durantoside I</i>                 | NQ                                | ND                               | NQ                                 | 706 $\pm$ 20                       | NQ                                 | NQ                                | 619 $\pm$ 17                       | 288 $\pm$ 18                       | NQ                                 |
| <i>Manuleoside H</i>                 | 22 $\pm$ 13                       | ND                               | 26 $\pm$ 6                         | 526 $\pm$ 48                       | NQ                                 | 31 $\pm$ 1                        | 564 $\pm$ 27                       | 568 $\pm$ 23                       | NQ                                 |
| <i>Phenylpropanoids</i>              | <b>1230 <math>\pm</math> 72</b>   | <b>1531 <math>\pm</math> 77</b>  | <b>3027 <math>\pm</math> 269</b>   | <b>29429 <math>\pm</math> 1027</b> | <b>2620 <math>\pm</math> 86</b>    | <b>9943 <math>\pm</math> 192</b>  | <b>30448 <math>\pm</math> 1118</b> | <b>12739 <math>\pm</math> 491</b>  | <b>2034 <math>\pm</math> 148</b>   |
| <i>Verbascoside</i>                  | NQ                                | NQ                               | 24.5 $\pm$ 0.7                     | 747 $\pm$ 19                       | 3.8 $\pm$ 0.1                      | NQ                                | 641 $\pm$ 57                       | 332 $\pm$ 19                       | NQ                                 |
| <i>Verbascoside</i>                  | 1079 $\pm$ 65                     | 1467 $\pm$ 70                    | 2489 $\pm$ 234                     | 21847 $\pm$ 801                    | 2219 $\pm$ 71                      | 8537 $\pm$ 128                    | 21908 $\pm$ 752                    | 8631 $\pm$ 391                     | 2034 $\pm$ 148                     |
| <i>Lariciresinol glucopyranoside</i> | 56 $\pm$ 2                        | NQ                               | 197 $\pm$ 6                        | 734 $\pm$ 24                       | 126 $\pm$ 0.6                      | 99 $\pm$ 6                        | 690 $\pm$ 24                       | 562 $\pm$ 23                       | NQ                                 |
| <i>Isoverbascoside</i>               | NQ                                | NQ                               | 13 $\pm$ 4                         | 1837 $\pm$ 63                      | NQ                                 | 564 $\pm$ 13                      | 1896 $\pm$ 17                      | 737 $\pm$ 2                        | NQ                                 |
| <i>Forsythoside A</i>                | NQ                                | 64 $\pm$ 7                       | 9.6 $\pm$ 0.5                      | 1267 $\pm$ 69                      | 45 $\pm$ 3                         | 94 $\pm$ 9                        | 2415 $\pm$ 122                     | 464 $\pm$ 46                       | NQ                                 |
| <i>Leucoseptoside A or isomer</i>    | NQ                                | NQ                               | 5 $\pm$ 1                          | 1078 $\pm$ 11                      | 6 $\pm$ 1                          | 215 $\pm$ 14                      | 1058 $\pm$ 71                      | 496 $\pm$ 0.4                      | NQ                                 |
| <i>Leucoseptoside A or isomer</i>    | NQ                                | NQ                               | NQ                                 | NQ                                 | NQ                                 | NQ                                | NQ                                 | NQ                                 | ND                                 |
| <i>Martynoside or isomer</i>         | 95 $\pm$ 5                        | NQ                               | 249 $\pm$ 21                       | 1301 $\pm$ 24                      | 204 $\pm$ 9                        | 355 $\pm$ 19                      | 1237 $\pm$ 50                      | 1070 $\pm$ 3                       | NQ                                 |
| <i>Martynoside or isomer</i>         | NQ                                | ND                               | NQ                                 | NQ                                 | NQ                                 | NQ                                | NQ                                 | NQ                                 | NQ                                 |
| <i>Osmanthisude B</i>                | NQ                                | NQ                               | 40 $\pm$ 2                         | 618 $\pm$ 16                       | 16 $\pm$ 1                         | 79 $\pm$ 3                        | 603 $\pm$ 27                       | 447 $\pm$ 7                        | NQ                                 |
| <i>Flavonoids</i>                    | <b>12070 <math>\pm</math> 716</b> | <b>8921 <math>\pm</math> 275</b> | <b>19452 <math>\pm</math> 1014</b> | <b>19675 <math>\pm</math> 854</b>  | <b>19750 <math>\pm</math> 1385</b> | <b>13510 <math>\pm</math> 596</b> | <b>18171 <math>\pm</math> 1206</b> | <b>13336 <math>\pm</math> 917</b>  | <b>12628 <math>\pm</math> 1000</b> |
| <i>Methyl quercetin</i>              | 626 $\pm$ 21                      | 119 $\pm$ 10                     | 1164 $\pm$ 59                      | 1386 $\pm$ 19                      | 1005 $\pm$ 45                      | 502 $\pm$ 13                      | 1588 $\pm$ 52                      | 986 $\pm$ 97                       | 617 $\pm$ 48                       |
| <i>Dimethyl Kaempferol</i>           | 2911 $\pm$ 182                    | 1417 $\pm$ 89                    | 5152 $\pm$ 247                     | 5262 $\pm$ 316                     | 5488 $\pm$ 124                     | 3083 $\pm$ 295                    | 5101 $\pm$ 373                     | 3006 $\pm$ 63                      | 2612 $\pm$ 110                     |
| <i>Dimethyl quercetin</i>            | 8533 $\pm$ 513                    | 7385 $\pm$ 176                   | 13136 $\pm$ 708                    | 13027 $\pm$ 519                    | 13257 $\pm$ 1216                   | 9925 $\pm$ 288                    | 11482 $\pm$ 781                    | 9344 $\pm$ 757                     | 9399 $\pm$ 842                     |
| <i>Total</i>                         | <b>14125 <math>\pm</math> 848</b> | <b>9182 <math>\pm</math> 352</b> | <b>23895 <math>\pm</math> 1384</b> | <b>56279 <math>\pm</math> 2096</b> | <b>24085 <math>\pm</math> 1572</b> | <b>24626 <math>\pm</math> 828</b> | <b>55282 <math>\pm</math> 2760</b> | <b>29915 <math>\pm</math> 1552</b> | <b>14861 <math>\pm</math> 1163</b> |

\*NQ: Not quantified. Compound detected, but their concentration is between the detection and quantification limits. \*ND: Not detected. Compound concentration is below of detection limit.

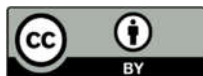

© 2020 by the authors. Submitted for possible open access publication under the terms and conditions of the Creative Commons Attribution (CC BY) license (<http://creativecommons.org/licenses/by/4.0/>).
